# Supplementary material for: Schistosoma haematobium infection is associated with alterations in energy and purine-related metabolism in preschool-aged children
Source: PubMed Central journal article supplement (PMC7735607; doi:10.1371/journal.pntd.0008866), 2020-12-14
Supplement: pntd.0008866.s007.pdf [file pntd.0008866.s007.pdf]

**S1 Table: Baseline MANOVA output for influence of age and sex on metabolite profiles**

| <b>Variable</b> | <b>F value</b> | <b>Hypothesis/Total<br/>df</b> | <b>Error<br/>df</b> | <b>Partial Eta-<br/>squared</b> | <b>p-value</b> |
|-----------------|----------------|--------------------------------|---------------------|---------------------------------|----------------|
| Intercept       | 0              | 64                             | 16                  | 0                               | 1.000          |
| Age             | 1.259          | 64                             | 16                  | 0.834                           | 0.314          |
| Sex             | 2.736          | 64                             | 16                  | 0.916                           | 0.014          |
| Age * Sex       | 0.619          | 64                             | 16                  | 0.712                           | 0.910          |

**Equation: Intercept + Age + Sex + Age \* Sex**

| <b>Model to obtain residuals</b> |                |                                |                     |                                 |                |
|----------------------------------|----------------|--------------------------------|---------------------|---------------------------------|----------------|
| <b>Variable</b>                  | <b>F value</b> | <b>Hypothesis/Total<br/>df</b> | <b>Error<br/>df</b> | <b>Partial Eta-<br/>squared</b> | <b>p-value</b> |
| Intercept                        | 1.066          | 64                             | 18                  | 0.791                           | 0.462          |
| Age                              | 1.133          | 64                             | 18                  | 0.801                           | 0.400          |

**Equation: Intercept + Age**

*df, degrees of freedom.*
