# Supplementary material for: Schistosoma haematobium infection is associated with alterations in energy and purine-related metabolism in preschool-aged children
Source: PubMed Central journal article supplement (PMC7735607; doi:10.1371/journal.pntd.0008866), 2020-12-14
Supplement: pntd.0008866.s008.pdf [file pntd.0008866.s008.pdf]

**S2 Table: Important metabolites identified from fold change analysis by sex**

| <b>Metabolite</b>      | <b>Fold Change (FC)</b> | <b>log<sub>2</sub> (FC)</b> |
|------------------------|-------------------------|-----------------------------|
| 3-Phosphoglyceric acid | 0.48062                 | -1.057                      |
| β-Alanine              | 0.46924                 | -1.0916                     |
| cis-Aconitic acid      | 0.45987                 | -1.1207                     |
| Sarcosine              | 0.44656                 | -1.1631                     |
| Ribulose-5-phosphate   | 0.32765                 | -1.6098                     |
| Citrulline             | 0.28031                 | -1.8349                     |
| Spermidine             | 0.25941                 | -1.9467                     |
| Inosine                | 0.25062                 | -1.9965                     |
| Uracil                 | 0.18962                 | -2.3988                     |
| Glyoxylic acid         | 0.15585                 | -2.6817                     |
| Guanine                | 0.10453                 | -3.258                      |
| Uridine diphosphate    | 0.10453                 | -3.258                      |
| Creatinine             | 0.10332                 | -3.2748                     |
| 2-Phosphoglyceric acid | 0.072414                | -3.7876                     |
| Fumaric acid           | 0.058175                | -4.1035                     |
| Glucose-1-phosphate    | 0.043478                | -4.5236                     |

*Table shows metabolites ranked in order of decreasing absolute fold change. Analysis is according to female/male ratio.*
