# Supplementary material for: Schistosoma haematobium infection is associated with alterations in energy and purine-related metabolism in preschool-aged children
Source: PubMed Central journal article supplement (PMC7735607; doi:10.1371/journal.pntd.0008866), 2020-12-14
Supplement: pntd.0008866.s009.pdf [file pntd.0008866.s009.pdf]

**S3 Table: Correlation pattern analysis of metabolites showing a female to male pattern**

| <b>Metabolite</b>              | <b>Correlation</b> | <b>t-statistic</b> | <b>p-value</b> | <b>FDR</b> |
|--------------------------------|--------------------|--------------------|----------------|------------|
| Creatinine                     | 0.50335            | 5.2427             | 1.23E-06       | 7.90E-05   |
| Citrulline                     | 0.46873            | 4.7757             | 7.85E-06       | 0.00025121 |
| cis-Aconitic acid              | 0.31171            | 2.9525             | 0.0041229      | 0.087955   |
| gamma-aminobutyric acid (GABA) | 0.2977             | 2.8066             | 0.0062697      | 0.10031    |
| Sarcosine                      | 0.26854            | 2.509              | 0.014102       | 0.1805     |
| 2-Oxoisovaleric acid           | 0.2305             | 2.1319             | 0.036047       | 0.36727    |
| Isocitric acid                 | 0.22574            | 2.0855             | 0.040171       | 0.36727    |
| Glucose-1-phosphate            | 0.21615            | 1.9925             | 0.049688       | 0.3975     |
| 3-Phosphoglyceric acid         | 0.18689            | 1.7122             | 0.090693       | 0.60492    |
| Asparagine                     | -0.18475           | -1.6918            | 0.094519       | 0.60492    |
| Ribulose-5-phosphate           | 0.17364            | 1.5868             | 0.11644        | 0.67749    |
| Fumaric acid                   | 0.16667            | 1.5213             | 0.13207        | 0.70437    |
| $\beta$ -Alanine               | 0.14805            | 1.3473             | 0.18164        | 0.77685    |
| Inosine                        | 0.14542            | 1.3228             | 0.18961        | 0.77685    |
| Guanosine monophosphate (GMP)  | 0.14044            | 1.2766             | 0.2054         | 0.77685    |
| 2-Phosphoglyceric.acid         | 0.14004            | 1.2729             | 0.20669        | 0.77685    |
| Glyoxylic acid                 | 0.13052            | 1.1848             | 0.23956        | 0.77685    |
| Inosine monophosphate (IMP)    | 0.1264             | 1.1468             | 0.25483        | 0.77685    |
| Pyruvic acid                   | 0.12088            | 1.0959             | 0.27636        | 0.77685    |
| Citric acid                    | 0.11845            | 1.0737             | 0.28617        | 0.77685    |
| N.N-Dimethylglycine            | 0.11823            | 1.0716             | 0.28709        | 0.77685    |
| Glucose-6-phosphate            | 0.10428            | 0.94363            | 0.34817        | 0.77685    |
| 3-Hydroxybutyric acid          | 0.10402            | 0.94127            | 0.34936        | 0.77685    |
| Guanine                        | 0.10342            | 0.93577            | 0.35217        | 0.77685    |
| Uridine diphosphate (UDP)      | 0.10342            | 0.93577            | 0.35217        | 0.77685    |
| Adenosine monophosphate (AMP)  | 0.10328            | 0.93453            | 0.35281        | 0.77685    |
| Hydroxyproline                 | 0.10234            | 0.92596            | 0.35722        | 0.77685    |
| Uracil                         | 0.095602           | 0.86438            | 0.38993        | 0.77685    |
| Methionine                     | 0.095524           | 0.86367            | 0.39032        | 0.77685    |
| Arginine                       | -0.095024          | -0.8591            | 0.39282        | 0.77685    |
| Lysine                         | -0.093629          | -0.84638           | 0.39984        | 0.77685    |
| Spermidine                     | 0.092362           | 0.83483            | 0.40627        | 0.77685    |
| Glutamine                      | 0.090823           | 0.8208             | 0.41417        | 0.77685    |
| Aspartic acid                  | -0.090674          | -0.81944           | 0.41494        | 0.77685    |
| Phenylalanine                  | -0.086671          | -0.78298           | 0.43592        | 0.77685    |
| Hypoxanthine                   | -0.086471          | -0.78117           | 0.43698        | 0.77685    |
| Malic acid                     | 0.079649           | 0.71913            | 0.47413        | 0.82012    |
| Betaine                        | -0.075391          | -0.68045           | 0.49816        | 0.839      |
| Isoleucine                     | -0.067526          | -0.60912           | 0.54415        | 0.89296    |
| Succinic acid                  | -0.063331          | -0.57113           | 0.56949        | 0.90425    |
| Ethanolamine phosphate         | 0.060998           | 0.55               | 0.58383        | 0.90425    |
| Creatine                       | -0.057916          | -0.52212           | 0.60301        | 0.90425    |
| Histidine                      | 0.055047           | 0.49617            | 0.62112        | 0.90425    |
| Lactic acid                    | 0.049938           | 0.45001            | 0.65391        | 0.90425    |

| <b>Metabolite</b>           | <b>Correlation</b> | <b>t-statistic</b> | <b>p-value</b> | <b>FDR</b> |
|-----------------------------|--------------------|--------------------|----------------|------------|
| 2-Oxoglutaric acid          | 0.048837           | 0.44006            | 0.66106        | 0.90425    |
| Uridine                     | -0.04522           | -0.4074            | 0.68479        | 0.90425    |
| Carnosine                   | 0.043415           | 0.3911             | 0.69675        | 0.90425    |
| 2-Hydroxybutyric acid       | 0.041292           | 0.37195            | 0.7109         | 0.90425    |
| Homoserine                  | 0.039607           | 0.35675            | 0.72221        | 0.90425    |
| Leucine                     | -0.038557          | -0.34727           | 0.72929        | 0.90425    |
| Tryptophan                  | 0.037895           | 0.3413             | 0.73376        | 0.90425    |
| Gluconic acid               | 0.036951           | 0.33279            | 0.74015        | 0.90425    |
| Ornithine                   | 0.035674           | 0.32127            | 0.74883        | 0.90425    |
| Alanine                     | 0.031103           | 0.28006            | 0.78014        | 0.91498    |
| Choline                     | -0.030209          | -0.272             | 0.78631        | 0.91498    |
| Serine                      | -0.025848          | -0.23271           | 0.81657        | 0.93323    |
| Glutamic acid               | -0.019584          | -0.17629           | 0.86051        | 0.95323    |
| Proline                     | -0.019108          | -0.172             | 0.86386        | 0.95323    |
| Adenosine diphosphate (ADP) | -0.011021          | -0.099196          | 0.92123        | 0.99315    |
| Valine                      | -0.0084686         | -0.07622           | 0.93943        | 0.99315    |
| Tyrosine                    | -0.0074647         | -0.067185          | 0.9466         | 0.99315    |
| Glycine                     | 0.0043594          | 0.039235           | 0.9688         | 0.99402    |
| Guanosine diphosphate (GDP) | 0.0013403          | 0.012063           | 0.99041        | 0.99402    |
| Threonine                   | -0.00083565        | -0.0075209         | 0.99402        | 0.99402    |

*Table shows metabolites ranked in order of decreasing significance based on absolute FDR values. FDR, adjusted p-value (False discovery rate corrected).*
