# Supplementary material for: Schistosoma haematobium infection is associated with alterations in energy and purine-related metabolism in preschool-aged children
Source: PubMed Central journal article supplement (PMC7735607; doi:10.1371/journal.pntd.0008866), 2020-12-14
Supplement: pntd.0008866.s010.pdf [file pntd.0008866.s010.pdf]

**S4 Table: Output from OPLSDA model S-plot for sex, along with corresponding VIP values**

| <b>Metabolite</b>             | <b>p[1]</b> | <b>p(corr)[1]</b> | <b>VIP</b> |
|-------------------------------|-------------|-------------------|------------|
| Creatinine                    | 0.27549     | 0.83449           | 2.8572     |
| Citrulline                    | 0.28376     | 0.74286           | 3.0786     |
| Sarcosine                     | 0.2158      | 0.58758           | 1.6958     |
| GABA                          | 0.24761     | 0.51792           | 2.4472     |
| cis-Aconitic acid             | 0.24515     | 0.48237           | 2.724      |
| $\beta$ -Alanine              | 0.12627     | 0.45482           | 0.70673    |
| Citric acid                   | 0.1852      | 0.44703           | 0.84383    |
| Ribulose-5-phosphate          | 0.12263     | 0.44449           | 0.82369    |
| Isocitric acid                | 0.21912     | 0.39771           | 2.1385     |
| Inosine                       | 0.12335     | 0.39247           | 0.78589    |
| Gluconic acid                 | 0.091583    | 0.38912           | 0.14954    |
| Glyoxylic acid                | 0.091254    | 0.38088           | 0.53769    |
| Hydroxyproline                | 0.12839     | 0.37893           | 0.59623    |
| Malic acid                    | 0.089404    | 0.37613           | 0.32553    |
| Guanosine monophosphate (GMP) | 0.18069     | 0.36823           | 1.185      |
| Lactic acid                   | 0.15143     | 0.3672            | 0.3541     |
| Tyrosine                      | 0.10023     | 0.3661            | 0.035139   |
| Threonine                     | 0.10289     | 0.36533           | 0.0040469  |
| Spermidine                    | 0.078093    | 0.35967           | 0.34483    |
| 3-Phosphoglyceric acid        | 0.106       | 0.35216           | 0.96721    |
| Alanine                       | 0.098844    | 0.34014           | 0.15541    |
| Valine                        | 0.090363    | 0.33706           | 0.039038   |
| Ornithine                     | 0.10801     | 0.32348           | 0.20481    |
| Methionine                    | 0.10469     | 0.31104           | 0.55285    |
| Histidine                     | 0.076237    | 0.30659           | 0.23536    |
| 2-Oxoisovaleric-acid          | 0.20386     | 0.30528           | 2.6467     |
| Glycine                       | 0.080119    | 0.29608           | 0.020284   |
| N.N-Dimethylglycine           | 0.10961     | 0.29401           | 0.75786    |
| Glucose-1-phosphate           | 0.080837    | 0.29223           | 1.0281     |
| Creatine                      | 0.085623    | 0.28529           | 0.29888    |
| Proline                       | 0.083795    | 0.27386           | 0.10053    |
| Inosine monophosphate (IMP)   | 0.10985     | 0.27044           | 0.88282    |
| Pyruvic acid                  | 0.11333     | 0.25751           | 0.9147     |
| Glutamine                     | 0.10691     | 0.25725           | 0.64903    |
| Tryptophan                    | 0.082756    | 0.24162           | 0.22317    |
| Leucine                       | 0.060968    | 0.24067           | 0.16795    |
| Ethanolamine phosphate        | 0.096447    | 0.22581           | 0.44797    |
| Glutamic acid                 | 0.077948    | 0.22498           | 0.11667    |
| Carnosine                     | 0.077743    | 0.22476           | 0.25821    |
| Adenosine monophosphate (AMP) | 0.10243     | 0.21539           | 0.84452    |
| 2-Phosphoglyceric acid        | 0.049194    | 0.2145            | 0.55225    |
| Lysine                        | 0.067508    | 0.21384           | 0.50823    |
| Glucose-6-phosphate           | 0.11745     | 0.2108            | 0.99899    |
| Fumaric-acid                  | 0.058516    | 0.1974            | 0.84955    |

| <b>Metabolite</b>           | <b>p[1]</b> | <b>p(corr)[1]</b> | <b>VIP</b> |
|-----------------------------|-------------|-------------------|------------|
| Serine                      | 0.058128    | 0.1968            | 0.13128    |
| Betaine                     | 0.071743    | 0.18678           | 0.49792    |
| Uracil                      | 0.038722    | 0.18235           | 0.34907    |
| Isoleucine                  | 0.050402    | 0.15271           | 0.38322    |
| Choline                     | 0.040908    | 0.15246           | 0.13937    |
| Aspartic acid               | 0.034616    | 0.12663           | 0.42621    |
| Homoserine                  | 0.050824    | 0.11895           | 0.29098    |
| Uridine diphosphate (UDP)   | 0.024667    | 0.11412           | 0.38436    |
| Uridine                     | 0.041775    | 0.10853           | 0.29927    |
| 2-Hydroxybutyric acid       | 0.031232    | 0.10034           | 0.221      |
| Phenylalanine               | 0.029308    | 0.093128          | 0.469      |
| 3-Hydroxybutyric acid       | 0.029264    | 0.080126          | 0.65323    |
| Adenosine diphosphate (ADP) | 0.032083    | 0.078068          | 0.077878   |
| Guanine                     | 0.015178    | 0.070223          | 0.38436    |
| Succinic acid               | 0.021835    | 0.063789          | 0.37276    |
| Arginine                    | 0.0083901   | 0.019567          | 0.70061    |
| 2-Oxoglutaric acid          | 0.0085815   | 0.015868          | 0.45414    |
| Hypoxanthine                | 0.0035884   | 0.0089486         | 0.59623    |
| Guanosine diphosphate (GDP) | -0.0044877  | -0.012625         | 0.0081925  |
| Asparagine                  | -0.048699   | -0.10995          | 1.407      |

*Table shows metabolites ranked in order of decreasing correlation or reliability coefficient [p(corr)]. p[1], covariance or contributions; p(corr)[1], correlation or reliability coefficient; VIP, variable importance in the projection.*
