# Supplementary material for: Schistosoma haematobium infection is associated with alterations in energy and purine-related metabolism in preschool-aged children
Source: PubMed Central journal article supplement (PMC7735607; doi:10.1371/journal.pntd.0008866), 2020-12-14
Supplement: pntd.0008866.s011.pdf [file pntd.0008866.s011.pdf]

**S5 Table: Follow-up MANOVA output for influence of infection on metabolite profiles**

| <b>Variable</b>                                                                                                         | <b>F value</b> | <b>Hypothesis/Total df</b> | <b>Error df</b> | <b>Partial Eta-squared</b> | <b>p-value</b> |
|-------------------------------------------------------------------------------------------------------------------------|----------------|----------------------------|-----------------|----------------------------|----------------|
| Intercept                                                                                                               | 0              | 56                         | 21              | 0                          | 1.000          |
| Age                                                                                                                     | 1.432          | 56                         | 21              | 0.792                      | 0.184          |
| Sex                                                                                                                     | 0.742          | 56                         | 21              | 0.664                      | 0.813          |
| Infection status                                                                                                        | 2.231          | 56                         | 21              | 0.856                      | 0.023          |
| Age * Sex                                                                                                               | 0.960          | 56                         | 21              | 0.719                      | 0.567          |
| Sex * Infection status                                                                                                  | 1.901          | 56                         | 21              | 0.835                      | 0.053          |
| Age * Infection status                                                                                                  | 1.056          | 56                         | 21              | 0.738                      | 0.463          |
| <b>Equation: Intercept + Age + Sex + Infection status + Age * Sex + Sex * Infection status + Age * Infection status</b> |                |                            |                 |                            |                |
| <b>Model to obtain residuals</b>                                                                                        |                |                            |                 |                            |                |
| Intercept                                                                                                               | 0              | 56                         | 24              | 0                          | 1.000          |
| Age                                                                                                                     | 1.214          | 56                         | 24              | 0.739                      | 0.307          |
| Sex                                                                                                                     | 0.778          | 56                         | 24              | 0.645                      | 0.782          |
| Age * Sex                                                                                                               | 1.002          | 56                         | 24              | 0.700                      | 0.516          |
| <b>Equation: Intercept + Age + Sex + Age * Sex</b>                                                                      |                |                            |                 |                            |                |

*df, degrees of freedom.*
