# Supplementary material for: Schistosoma haematobium infection is associated with alterations in energy and purine-related metabolism in preschool-aged children
Source: PubMed Central journal article supplement (PMC7735607; doi:10.1371/journal.pntd.0008866), 2020-12-14
Supplement: pntd.0008866.s012.pdf [file pntd.0008866.s012.pdf]

**S6 Table: Important metabolites identified from fold change analysis by infection status**

| <b>Metabolite</b>             | <b>Fold Change (FC)</b> | <b>log<sub>2</sub> (FC)</b> |
|-------------------------------|-------------------------|-----------------------------|
| Choline                       | 8.8175                  | 3.1404                      |
| Lactic acid                   | 6.1847                  | 2.6287                      |
| Glutamic acid                 | 2.4991                  | 1.3214                      |
| Serine                        | 2.4807                  | 1.3107                      |
| Succinic acid                 | 2.4599                  | 1.2986                      |
| Histidine                     | 2.453                   | 1.2946                      |
| Phenylalanine                 | 2.3656                  | 1.2422                      |
| Lysine                        | 2.3145                  | 1.2107                      |
| Pyruvic acid                  | 2.2875                  | 1.1937                      |
| Hypoxanthine                  | 2.1134                  | 1.0796                      |
| Ornithine                     | 2.1105                  | 1.0776                      |
| Leucine                       | 2.1069                  | 1.0752                      |
| Homoserine                    | 2.0195                  | 1.014                       |
| Glucose-6-phosphate           | 0.48149                 | -1.0544                     |
| Spermidine                    | 0.4527                  | -1.1434                     |
| Asparagine                    | 0.44836                 | -1.1573                     |
| 2-Hydroxybutyric acid         | 0.44462                 | -1.1694                     |
| Inosine monophosphate (IMP)   | 0.42322                 | -1.2405                     |
| Ethanolamine phosphate        | 0.41315                 | -1.2752                     |
| Guanosine monophosphate (GMP) | 0.32008                 | -1.6435                     |
| Adenosine monophosphate (AMP) | 0.25                    | -2.000                      |
| Adenosine diphosphate (ADP)   | 0.1844                  | -2.4391                     |
| Sarcosine                     | 0.17928                 | -2.4797                     |
| Inosine                       | 0.13699                 | -2.8679                     |
| 3-Phosphoglyceric acid        | 0.1361                  | -2.8773                     |

*Table shows metabolites ranked in order of decreasing absolute fold change. Analysis is according to uninfected/infected ratio.*
