# Supplementary material for: Schistosoma haematobium infection is associated with alterations in energy and purine-related metabolism in preschool-aged children
Source: PubMed Central journal article supplement (PMC7735607; doi:10.1371/journal.pntd.0008866), 2020-12-14
Supplement: pntd.0008866.s013.pdf [file pntd.0008866.s013.pdf]

**S7 Table: Correlation pattern analysis of compounds showing patterns from negative to positive for infection**

| <b>Metabolite</b>              | <b>Correlation</b> | <b>t-statistic</b> | <b>p-value</b> | <b>FDR</b> |
|--------------------------------|--------------------|--------------------|----------------|------------|
| Adenosine diphosphate (ADP)    | 0.43076            | 4.2959             | 4.80E-05       | 0.002689   |
| 3-Phosphoglyceric acid         | 0.4095             | 4.0397             | 0.00012098     | 0.0033875  |
| Adenosine monophosphate (AMP)  | 0.36253            | 3.5009             | 0.00075695     | 0.01413    |
| Inosine                        | 0.27435            | 2.5677             | 0.012077       | 0.11995    |
| Asparagine                     | 0.26342            | 2.4575             | 0.016124       | 0.11995    |
| Lactic acid                    | -0.26245           | -2.4479            | 0.016532       | 0.11995    |
| Choline                        | -0.26204           | -2.4438            | 0.016708       | 0.11995    |
| Serine                         | -0.2554            | -2.3774            | 0.019791       | 0.11995    |
| 2-Hydroxybutyric acid          | 0.25256            | 2.3492             | 0.021249       | 0.11995    |
| cis-Aconitic acid              | -0.25007           | -2.3245            | 0.022602       | 0.11995    |
| Sarcosine                      | 0.24839            | 2.3078             | 0.023561       | 0.11995    |
| Histidine                      | -0.23692           | -2.1948            | 0.031042       | 0.13583    |
| Guanosine monophosphate (GMP)  | 0.23626            | 2.1882             | 0.031533       | 0.13583    |
| Glucose-6-phosphate            | 0.22272            | 2.0561             | 0.042991       | 0.15628    |
| Ethanolamine phosphate         | 0.22243            | 2.0533             | 0.04327        | 0.15628    |
| Glutamic acid                  | -0.22102           | -2.0396            | 0.044652       | 0.15628    |
| Creatinine                     | -0.2157            | -1.9881            | 0.050184       | 0.1587     |
| Succinic acid                  | -0.21244           | -1.9566            | 0.053837       | 0.1587     |
| Alanine                        | -0.21244           | -1.9566            | 0.053844       | 0.1587     |
| Glycine                        | -0.19987           | -1.8358            | 0.070053       | 0.19615    |
| Lysine                         | -0.19299           | -1.7702            | 0.080451       | 0.21213    |
| Leucine                        | -0.19122           | -1.7533            | 0.083335       | 0.21213    |
| Phenylalanine                  | -0.18497           | -1.694             | 0.094112       | 0.22914    |
| Aspartic acid                  | -0.17888           | -1.6363            | 0.10566        | 0.24654    |
| Ornithine                      | -0.17441           | -1.5941            | 0.11481        | 0.25718    |
| Threonine                      | -0.17199           | -1.5713            | 0.12001        | 0.25848    |
| Tyrosine                       | -0.13279           | -1.2058            | 0.23141        | 0.46351    |
| Inosine monophosphate (IMP)    | 0.13183            | 1.1969             | 0.23484        | 0.46351    |
| Tryptophan                     | 0.12799            | 1.1614             | 0.24888        | 0.46351    |
| 2-Oxoisovaleric acid           | 0.12791            | 1.1607             | 0.24917        | 0.46351    |
| Spermidine                     | 0.12594            | 1.1426             | 0.25658        | 0.46351    |
| Pyruvic acid                   | -0.1144            | -1.0364            | 0.30308        | 0.53039    |
| Creatine                       | 0.10995            | 0.99558            | 0.32242        | 0.53498    |
| Citrulline                     | -0.10941           | -0.99064           | 0.32481        | 0.53498    |
| 2-Oxoglutaric acid             | -0.087052          | -0.78646           | 0.43389        | 0.69423    |
| Hypoxanthine                   | -0.084189          | -0.7604            | 0.44922        | 0.69879    |
| Isoleucine                     | -0.075729          | -0.68353           | 0.49623        | 0.75104    |
| Gamma aminobutyric acid (GABA) | -0.072465          | -0.65391           | 0.51503        | 0.75406    |
| Carnosine                      | 0.069942           | 0.63102            | 0.5298         | 0.75406    |
| Homoserine                     | -0.068454          | -0.61753           | 0.53862        | 0.75406    |
| Hydroxyproline                 | 0.060526           | 0.54574            | 0.58675        | 0.78979    |

| <b>Metabolite</b>     | <b>Correlation</b> | <b>t-statistic</b> | <b>p-value</b> | <b>FDR</b> |
|-----------------------|--------------------|--------------------|----------------|------------|
| Glutamine             | 0.059074           | 0.5326             | 0.59577        | 0.78979    |
| Valine                | -0.057369          | -0.51717           | 0.60645        | 0.78979    |
| 3-Hydroxybutyric acid | 0.052369           | 0.47197            | 0.63822        | 0.81228    |
| Gluconic acid         | -0.042401          | -0.38196           | 0.70349        | 0.86895    |
| Malic acid            | -0.040099          | -0.36118           | 0.7189         | 0.86895    |
| Uridine               | -0.038359          | -0.34548           | 0.73063        | 0.86895    |
| Ribulose-5-phosphate  | 0.033535           | 0.30198            | 0.76344        | 0.86895    |
| Proline               | -0.033532          | -0.30196           | 0.76345        | 0.86895    |
| Arginine              | -0.031727          | -0.28568           | 0.77585        | 0.86895    |
| Methionine            | -0.029174          | -0.26267           | 0.79347        | 0.87126    |
| Citric acid           | 0.026801           | 0.2413             | 0.80993        | 0.87223    |
| N.N-Dimethylglycine   | -0.023034          | -0.20736           | 0.83625        | 0.88358    |
| Isocitric acid        | 0.015931           | 0.1434             | 0.88633        | 0.91916    |
| Betaine               | -0.0096291         | -0.086666          | 0.93115        | 0.93889    |
| $\beta$ -Alanine      | 0.0085451          | 0.076909           | 0.93889        | 0.93889    |

*Table shows metabolites ranked in order of decreasing significance based on absolute FDR values. FDR, adjusted p-value (False discovery rate corrected).*
