# Supplementary material for: Schistosoma haematobium infection is associated with alterations in energy and purine-related metabolism in preschool-aged children
Source: PubMed Central journal article supplement (PMC7735607; doi:10.1371/journal.pntd.0008866), 2020-12-14
Supplement: pntd.0008866.s014.pdf [file pntd.0008866.s014.pdf]

**S8 Table: Output from OPLSDA model S-plot for infection, along with corresponding VIP values**

| <b>Metabolite</b>              | <b>p[1]</b> | <b>p(corr)[1]</b> | <b>VIP</b> |
|--------------------------------|-------------|-------------------|------------|
| Adenosine monophosphate (AMP)  | 0.16332     | 0.71903           | 1.5507     |
| 3-Phosphoglyceric acid         | 0.13835     | 0.71135           | 1.4998     |
| Adenosine diphosphate (ADP)    | 0.17779     | 0.62789           | 2.297      |
| Ethanolamine phosphate         | 0.19096     | 0.5937            | 1.3473     |
| Glucose 6 phosphate            | 0.2032      | 0.55796           | 1.5275     |
| Guanosine monophosphate (GMP)  | 0.16846     | 0.51693           | 1.4499     |
| Inosine monophosphate (IMP)    | 0.11625     | 0.3841            | 0.75132    |
| Asparagine                     | 0.13774     | 0.32756           | 2.086      |
| Sarcosine                      | 0.06345     | 0.31531           | 0.94127    |
| Carnosine                      | 0.094955    | 0.31492           | 0.39715    |
| Spermidine                     | 0.053364    | 0.29941           | 0.4227     |
| 2-Hydroxybutyric acid          | 0.09136     | 0.27153           | 1.6003     |
| Glutamine                      | 0.10048     | 0.26156           | 0.42738    |
| Inosine                        | 0.056996    | 0.25414           | 1.1587     |
| Creatine                       | 0.079849    | 0.24129           | 0.68521    |
| Ribulose-5-phosphate           | 0.048322    | 0.20786           | 0.14681    |
| 2-Oxoisovaleric acid           | 0.074067    | 0.17949           | 0.99399    |
| Isocitric acid                 | 0.068813    | 0.17527           | 0.11779    |
| Hydroxyproline                 | 0.043562    | 0.14883           | 0.33362    |
| Tryptophan                     | 0.058044    | 0.14599           | 0.95828    |
| Citric acid                    | 0.053018    | 0.12601           | 0.21236    |
| $\beta$ -Alanine               | 0.026035    | 0.10311           | 0.040634   |
| N.N-Dimethylglycine            | 0.025649    | 0.093055          | 0.11956    |
| Proline                        | 0.01185     | 0.036949          | 0.20252    |
| Betaine                        | 0.011335    | 0.031553          | 0.065143   |
| 3-Hydroxybutyric acid          | 0.0062571   | 0.024438          | 0.25251    |
| Pyruvic acid                   | 0.0044649   | 0.014935          | 0.64409    |
| Malic acid                     | -0.0055014  | -0.025446         | 0.16326    |
| Citrulline                     | -0.0087832  | -0.026973         | 0.67094    |
| cis-Aconitic acid              | -0.010699   | -0.028551         | 1.7647     |
| gamma-aminobutyric acid (GABA) | -0.022744   | -0.05116          | 0.60668    |
| Methionine                     | -0.018806   | -0.05124          | 0.20164    |
| Gluconic acid                  | -0.017143   | -0.071042         | 0.19269    |
| Uridine                        | -0.026073   | -0.079352         | 0.23735    |
| Isoleucine                     | -0.030496   | -0.090193         | 0.4822     |
| Homoserine                     | -0.02843    | -0.10138          | 0.36151    |
| Arginine                       | -0.037684   | -0.11043          | 0.20389    |
| Valine                         | -0.035022   | -0.12602          | 0.30024    |
| Lactic acid                    | -0.044449   | -0.12925          | 1.6997     |
| Hypoxanthine                   | -0.052029   | -0.12984          | 0.63531    |
| Tyrosine                       | -0.049312   | -0.17242          | 0.7152     |
| 2-Oxoglutaric acid             | -0.049913   | -0.18307          | 0.44697    |

| <b>Metabolite</b> | <b>p[1]</b> | <b>p(corr)[1]</b> | <b>VIP</b> |
|-------------------|-------------|-------------------|------------|
| Succinic acid     | -0.066637   | -0.18646          | 1.4298     |
| Asp               | -0.046762   | -0.20107          | 0.78341    |
| Creatinine        | -0.046943   | -0.20107          | 0.94836    |
| Threonine         | -0.069166   | -0.24389          | 0.91853    |
| Ornithine         | -0.08025    | -0.25436          | 1.0362     |
| Glycine           | -0.06732    | -0.25854          | 0.98005    |
| Alanine           | -0.070685   | -0.26489          | 1.0675     |
| Phenylalanine     | -0.080367   | -0.29783          | 0.93998    |
| Leucine           | -0.085806   | -0.32052          | 0.964      |
| Lysine            | -0.09314    | -0.32526          | 1.0408     |
| Glutamic acid     | -0.11037    | -0.33346          | 1.3776     |
| Histidine         | -0.09129    | -0.35142          | 1.159      |
| Serine            | -0.10134    | -0.36012          | 1.3535     |
| Choline           | -0.12508    | -0.40257          | 1.5333     |

*Table shows metabolites ranked in order of decreasing correlation or reliability coefficient [p(corr)]. p[1], covariance or contributions; p(corr)[1], correlation or reliability coefficient; VIP, variable importance in the projection.*
