# Supplementary material for: Schistosoma haematobium infection is associated with alterations in energy and purine-related metabolism in preschool-aged children
Source: PubMed Central journal article supplement (PMC7735607; doi:10.1371/journal.pntd.0008866), 2020-12-14
Supplement: pntd.0008866.s015.pdf [file pntd.0008866.s015.pdf]

**S9 Table: MANOVA output for influence of infection intensity on metabolite profiles**

| Variable                                                                            | F value | Hypothesis/<br>Total df | Error df | Partial<br>Eta-squared | p-value |
|-------------------------------------------------------------------------------------|---------|-------------------------|----------|------------------------|---------|
| <b>Model with all metabolites (n=56)</b>                                            |         |                         |          |                        |         |
| Intercept                                                                           | 0.309   | 56                      | 26       | 0.399                  | 1.000   |
| Infection intensity (log transformed egg count +1)                                  | 2.729   | 56                      | 26       | 0.855                  | 0.003   |
| <b>Equation: Intercept + Infection intensity (log (x+1) transformed)</b>            |         |                         |          |                        |         |
| <b>Model using data for significant metabolites from OPLSDA for infection (n=4)</b> |         |                         |          |                        |         |
| Intercept                                                                           | 0.586   | 4                       | 78       | 0.29                   | 0.674   |
| Infection intensity (log transformed egg count +1)                                  | 5.178   | 4                       | 78       | 0.21                   | 0.001   |
| <b>Equation: Intercept + Infection intensity (log (x+1) transformed)</b>            |         |                         |          |                        |         |

*df, degrees of freedom.*
