# Supplementary material for: Schistosoma haematobium infection is associated with alterations in energy and purine-related metabolism in preschool-aged children
Source: PubMed Central journal article supplement (PMC7735607; doi:10.1371/journal.pntd.0008866), 2020-12-14
Supplement: pntd.0008866.s016.pdf [file pntd.0008866.s016.pdf]

**S10 Table: Correlation pattern analysis of metabolites showing patterns from positive for infection to negative post-treatment**

| <b>Metabolite</b>             | <b>Correlation</b> | <b>t-statistic</b> | <b>p-value</b> | <b>FDR</b> |
|-------------------------------|--------------------|--------------------|----------------|------------|
| Glucose-6-phosphate           | -0.48165           | -1.738             | 0.11285        | 0.24623    |
| 3-Phosphoglyceric acid        | -0.47              | -1.6839            | 0.12312        | 0.24623    |
| Adenosine diphosphate (ADP)   | -0.39272           | -1.3504            | 0.20666        | 0.27554    |
| Adenosine monophosphate (AMP) | -0.25002           | -0.81657           | 0.4332         | 0.4332     |

*Table shows metabolites ranked in order of decreasing significance based on absolute FDR values. FDR, adjusted p-value (False discovery rate corrected).*
