# Supplementary material for: Schistosoma haematobium infection is associated with alterations in energy and purine-related metabolism in preschool-aged children
Source: PubMed Central journal article supplement (PMC7735607; doi:10.1371/journal.pntd.0008866), 2020-12-14
Supplement: pntd.0008866.s017.pdf [file pntd.0008866.s017.pdf]

**S11 Table: Analysis output from metabolite pathway analysis**

| <b>Metabolic pathway</b>                    | <b>Total Cmpds</b> | <b>Hits</b> | <b>Raw p</b> | <b>-log(p)</b> | <b>Holm adjust</b> | <b>FDR</b> | <b>Impact</b> |
|---------------------------------------------|--------------------|-------------|--------------|----------------|--------------------|------------|---------------|
| Purine metabolism                           | 92                 | 2           | 3.61E-05     | 10.229         | 0.000253           | 0.000253   | 0.06428       |
| Nitrogen metabolism                         | 39                 | 1           | 0.000757     | 7.1862         | 0.004542           | 0.002650   | 0             |
| Glycolysis or Gluconeogenesis               | 31                 | 1           | 0.042991     | 3.1468         | 0.21496            | 0.042991   | 0.06977       |
| Pentose phosphate pathway                   | 32                 | 1           | 0.042991     | 3.1468         | 0.21496            | 0.042991   | 0.04348       |
| Starch and sucrose metabolism               | 50                 | 1           | 0.042991     | 3.1468         | 0.21496            | 0.042991   | 0.02439       |
| Galactose metabolism                        | 41                 | 1           | 0.042991     | 3.1468         | 0.21496            | 0.042991   | 0.01724       |
| Amino sugar and nucleotide sugar metabolism | 88                 | 1           | 0.042991     | 3.1468         | 0.21496            | 0.042991   | 0.00917       |

*Table shows metabolites ranked in order of decreasing significance based on absolute FDR values. FDR, adjusted p-value (False discovery rate correction for multiple comparisons); Holm adjust, adjusted p value (Holm-Bonferroni correction for multiple comparisons); Raw p, unadjusted p values; Hits, number of metabolite hits from test data found in pathway, Total Cmpds, total number of compounds in pathway.*
